# Supplementary material for: Metagenomics reveals niche partitioning within the phototrophic zone of a microbial mat
Source: PubMed Central journal article supplement (PMC6133358; doi:10.1371/journal.pone.0202792), 2018-09-11
Supplement: pone.0202792.s011.pdf [file pone.0202792.s011.pdf]

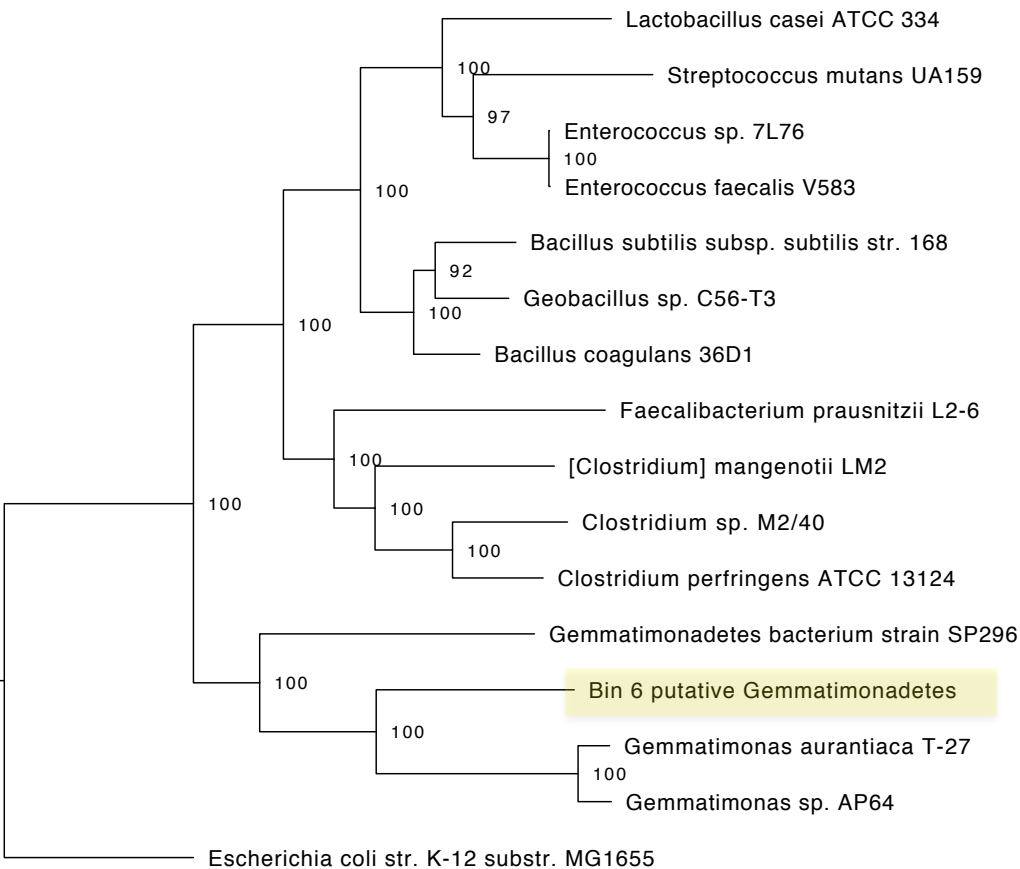

0.1
